# Supplementary material
Source: publisher figshare collection journal article supplement (https://gsajournals.figshare.com/articles/dataset/_/13413830)

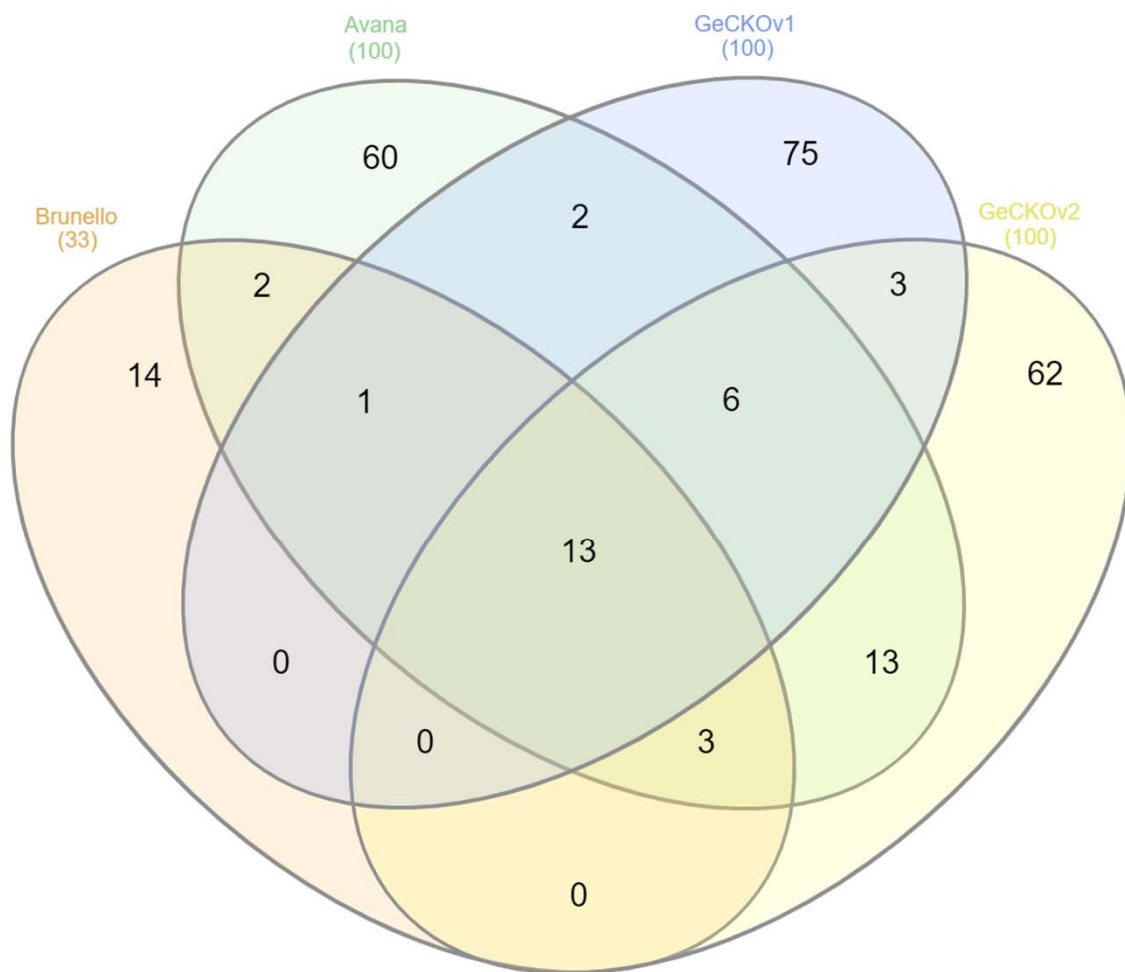

**Figure S2**

Supplement: Supplementary file 1 [file 2]

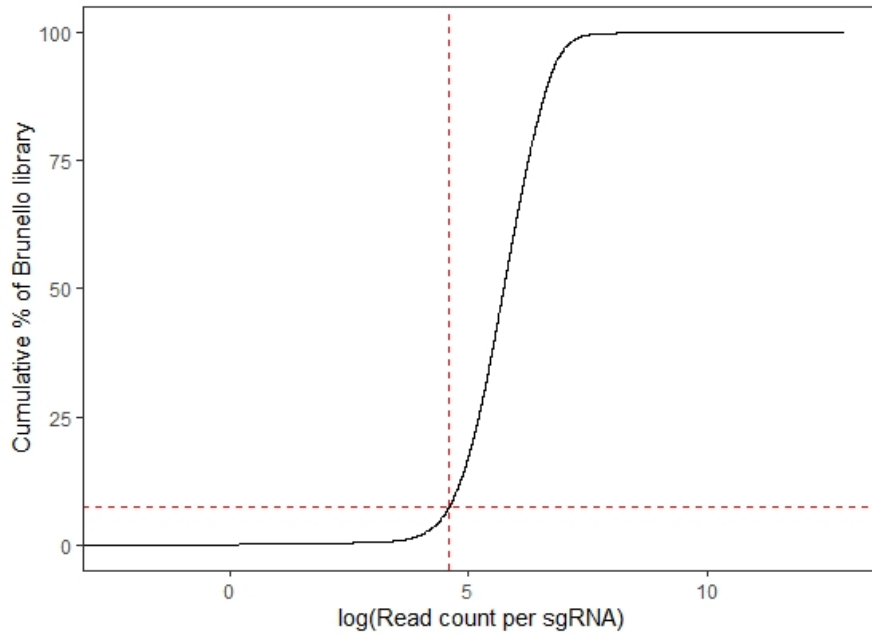

**Figure S1**

Supplement: Supplementary file 2 [file 2]

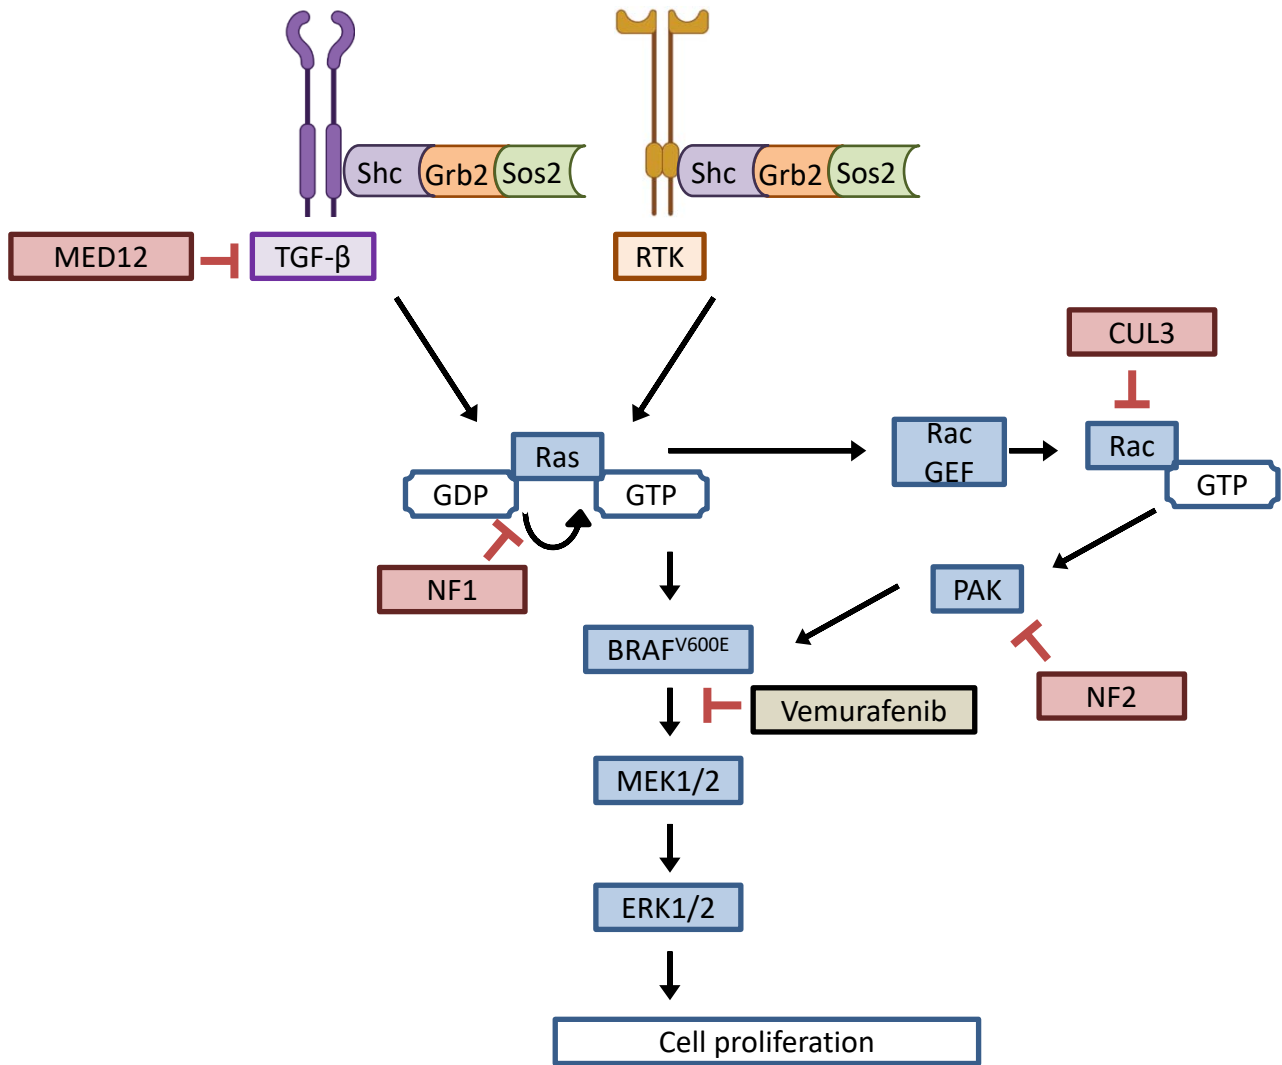

**Figure S3**

Supplement: Supplementary file 3 [file 2]
